# Supplementary material for: WITHDRAWN: A Study on the Influence of Face Consciousness and Information on Consumers’ Food Waste Behavior in Different Dining Scenarios and Its Mechanisms
Source: Research Square preprint supplement (doi:10.21203/rs.3.rs-6294015/v1), 2025-06-16
Supplement: Supplementary file 1 [file 2e9dbf914dc68098b55bdb9b.docx]

**Highlights**

1. this study combines the VBN theory (Value-Belief-Norm theory) and the Information Framing Theory, innovatively applying them to differentiated dining scenarios in China. It constructs a theoretical framework for the influence of “face consciousness” and informational interventions on consumer food waste behavior.
2. This study reveals the mechanisms through which information framing influences consumers’ food waste behavior, identifying both a mediation effect and a serial mediation effect involving perceived value and personal norms.
